# Supplementary material for: Validation of Machine Learning Models to Predict Adverse Outcomes in Patients with COVID-19: A Prospective Pilot Study
Source: PubMed Central journal article supplement — Yonsei Med J. 2022 Apr 20;63(5):422–9. doi: 10.3349/ymj.2022.63.5.422 (PMC9086701; doi:10.3349/ymj.2022.63.5.422), 2022-04-20
Supplement: ymj-63-422-s001.pdf [file ymj-63-422-s001.pdf]

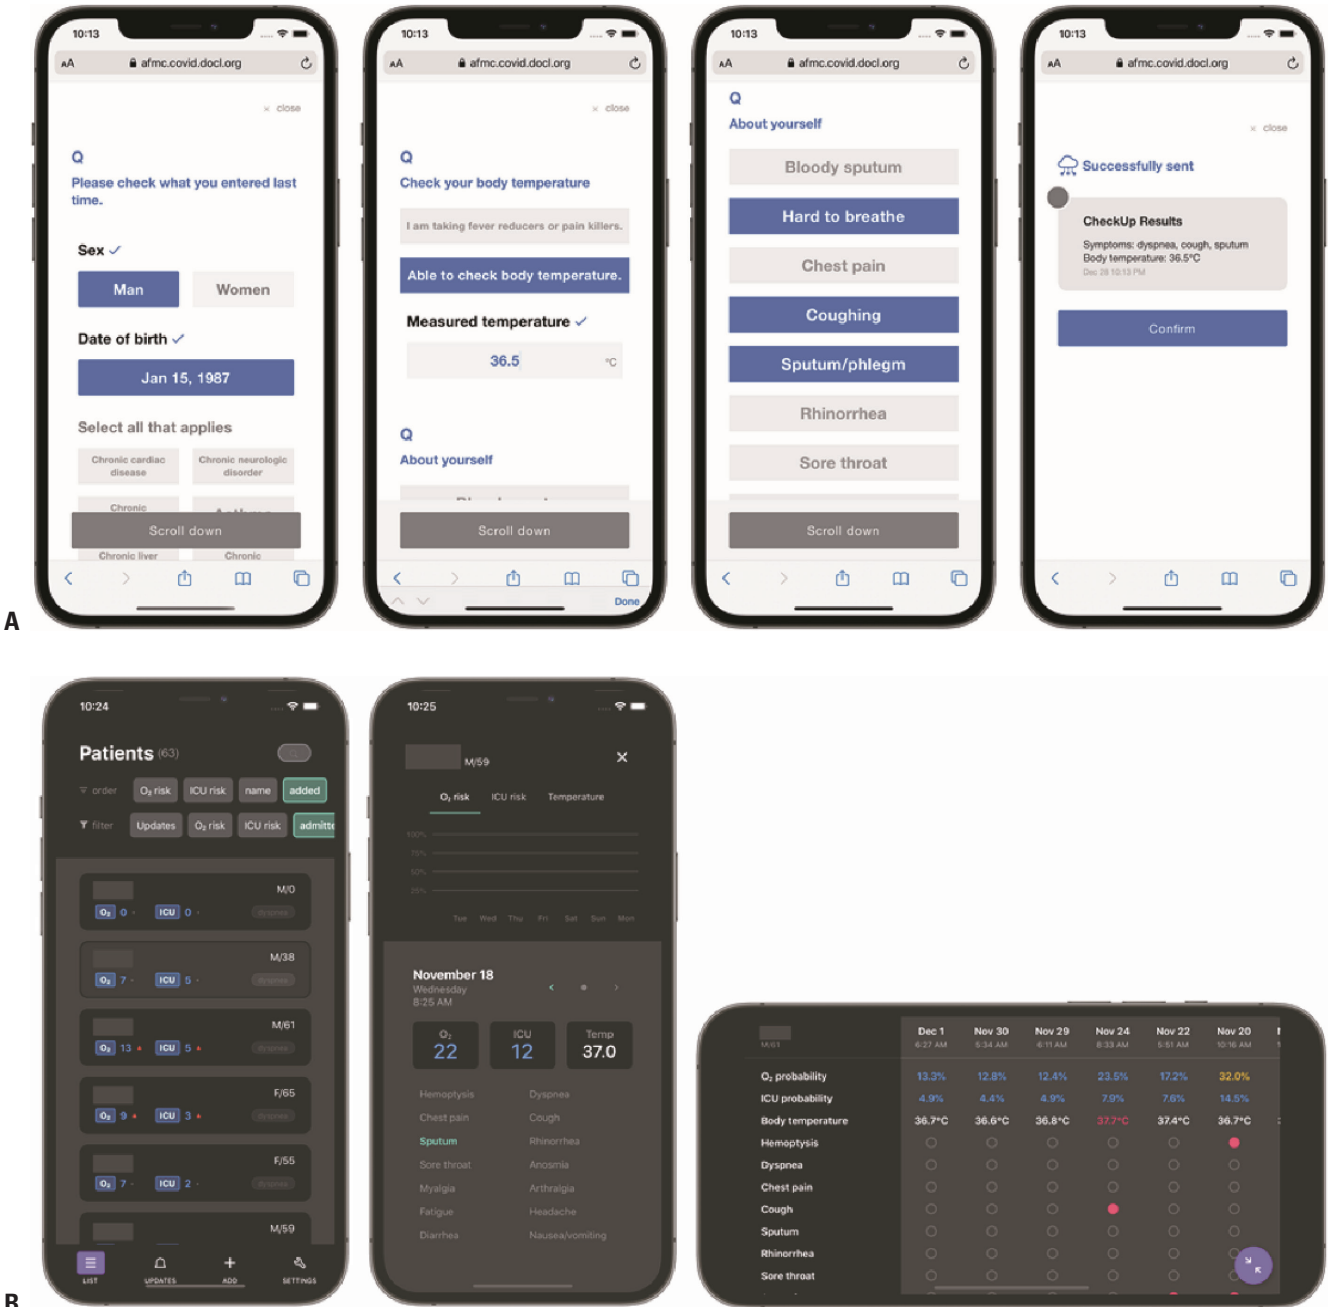

**Supplementary Fig. 1.** Example pages of the online application using predeveloped machine learning models. (A) Patient application. Patients can provide their baseline information along with daily symptoms and body temperature to the web-based application. (B) Physician application. Physicians can inspect their patients' daily status with calculated oxygen scores or intensive care unit scores, in detail.
