# Supplementary material for: Validation of Machine Learning Models to Predict Adverse Outcomes in Patients with COVID-19: A Prospective Pilot Study
Source: PubMed Central journal article supplement — Yonsei Med J. 2022 Apr 20;63(5):422–9. doi: 10.3349/ymj.2022.63.5.422 (PMC9086701; doi:10.3349/ymj.2022.63.5.422), 2022-04-20
Supplement: ymj-63-422-s002.pdf [file ymj-63-422-s002.pdf]

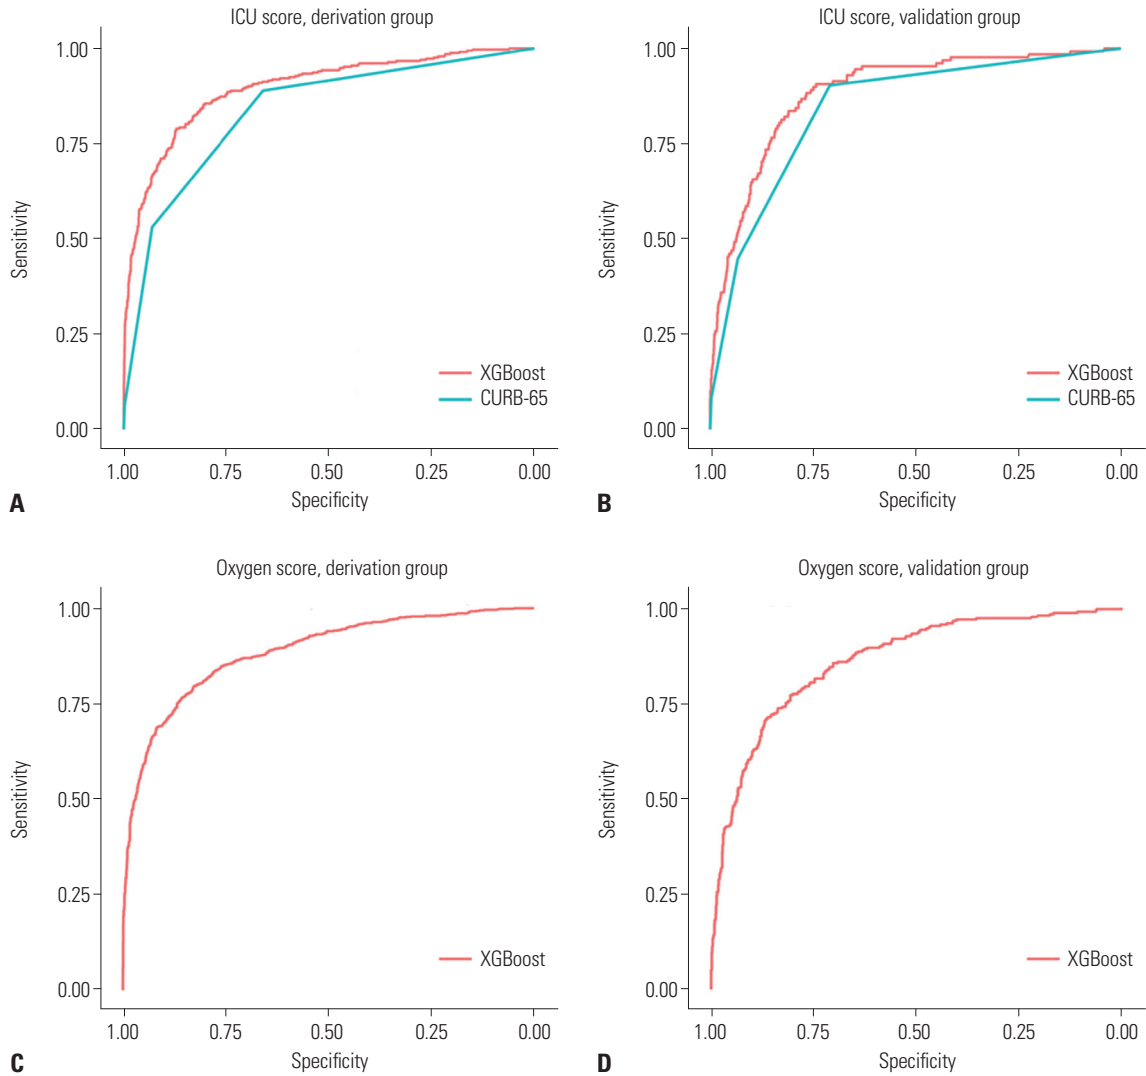

**Supplementary Fig. 2.** Discrimination performance of the predeveloped machine learning models in a separate retrospective cohort. (A) ROC curve of ICU score to predict the need for intensive care within 30 days of hospitalization in the derivation group. The AUC was 0.897 (95% CI: 0.877–0.917), which was significantly higher than that of CURB-65 (0.836 with 95% CI: 0.825–0.847). (B) ROC curve of ICU score to predict the need for intensive care within 30 days of hospitalization in the validation group. The AUC was 0.885 (95% CI: 0.855–0.915), which was significantly higher than that of CURB-65 (0.843 with 95% CI: 0.829–0.857). (C) ROC curve of oxygen score to predict the need for oxygen supplement within 30 days of hospitalization in the derivation group. The AUC was 0.886 (95% CI: 0.872–0.900). (D) ROC curve of oxygen score to predict the need for oxygen supplement within 30 days of hospitalization in the validation group. The AUC was 0.865 (95% CI: 0.842–0.888). ROC, receiver-operating characteristics; ICU, intensive care unit; AUC, area under the receiver-operating characteristics curve; CI, confidence interval.
