# Supplementary material for: Validation of Machine Learning Models to Predict Adverse Outcomes in Patients with COVID-19: A Prospective Pilot Study
Source: PubMed Central journal article supplement — Yonsei Med J. 2022 Apr 20;63(5):422–9. doi: 10.3349/ymj.2022.63.5.422 (PMC9086701; doi:10.3349/ymj.2022.63.5.422), 2022-04-20
Supplement: ymj-63-422-s003.pdf [file ymj-63-422-s003.pdf]

**Supplementary Table 1.** Variables Included for Developing the Machine Learning Models

| Demographics | Smoking history | Comorbidities                         | Activities of daily living | Symptoms and signs |
|--------------|-----------------|---------------------------------------|----------------------------|--------------------|
| Age          | Never smoker    | Diabetes                              | Independent                | Altered mentality  |
| Sex          | Ex-smoker       | Heart failure                         | Partially dependent        | Cough              |
|              | Current smoker  | Hypertension                          | Totally dependent          | Sputum             |
|              |                 | Asthma                                |                            | Hemoptysis         |
|              |                 | Chronic obstructive pulmonary disease |                            | Sore throat        |
|              |                 | Chronic kidney disease                |                            | Rhinorrhea         |
|              |                 | Cancer                                |                            | Chest discomfort   |
|              |                 | Chronic liver disease                 |                            | Myalgia            |
|              |                 | Chronic neurological disorders        |                            | Arthralgia         |
|              |                 | Chronic hematologic disorders         |                            | Fatigue            |
|              |                 | HIV infection                         |                            | Dyspnea            |
|              |                 | Autoimmune diseases                   |                            | Anosmia            |
|              |                 | Dementia                              |                            | Headache           |
|              |                 | Pregnancy                             |                            | Vomiting           |
|              |                 |                                       |                            | Diarrhea           |
|              |                 |                                       |                            | Body temperature   |
