# Supplementary material for: Validation of Machine Learning Models to Predict Adverse Outcomes in Patients with COVID-19: A Prospective Pilot Study
Source: PubMed Central journal article supplement — Yonsei Med J. 2022 Apr 20;63(5):422–9. doi: 10.3349/ymj.2022.63.5.422 (PMC9086701; doi:10.3349/ymj.2022.63.5.422), 2022-04-20
Supplement: ymj-63-422-s004.pdf [file ymj-63-422-s004.pdf]

**Supplementary Table 2.** Feature Importance to the ICU Score (Gradient Boosting Machine Learning Model) for the Prediction of Patients Requiring Intensive Care

| Feature                         | Relative importance |
|---------------------------------|---------------------|
| ADL score 0                     | 238.687             |
| Age                             | 226.385             |
| No dyspnea                      | 187.690             |
| Initial body temperature        | 87.814              |
| ADL score 2                     | 67.042              |
| Female                          | 33.186              |
| Dyspnea                         | 29.291              |
| Male                            | 18.327              |
| No chronic kidney disease       | 18.250              |
| Normal mentality                | 11.669              |
| Ex-smoker                       | 9.760               |
| No headache                     | 9.574               |
| No dementia                     | 9.030               |
| No chronic cardiac disease      | 8.052               |
| No hemoptysis                   | 7.680               |
| Not fatigued                    | 6.414               |
| No hypertension                 | 6.322               |
| Hypertension                    | 6.269               |
| Heart failure                   | 5.943               |
| Diabetes                        | 5.231               |
| Current smoker                  | 5.066               |
| No sore throat                  | 4.563               |
| Dementia                        | 4.303               |
| Chronic kidney disease          | 4.262               |
| No heart failure                | 4.113               |
| No cancer                       | 3.917               |
| No chronic hematologic disorder | 3.749               |
| No COPD                         | 3.745               |
| Headache                        | 3.661               |
| Chronic hematologic disorder    | 3.650               |
| No nausea or vomiting           | 3.542               |
| No chest pain                   | 3.459               |
| Sore throat                     | 3.347               |
| No cough                        | 3.233               |
| Hemoptysis                      | 2.677               |
| No diabetes                     | 2.032               |
| Nausea or vomiting              | 1.628               |
| No diarrhea                     | 1.591               |
| Chronic cardiac disease         | 1.545               |
| No chronic neurologic disorder  | 1.460               |
| Chest pain                      | 1.252               |
| No smoking                      | 1.245               |
| Rhinorrhea                      | 1.208               |
| No sputum                       | 1.193               |
| No myalgia                      | 1.164               |
| Altered mentality               | 1.114               |
| Asthma                          | 1.112               |
| Diarrhea                        | 1.038               |
| ADL score 1                     | 1.020               |
| No rhinorrhea                   | 0.930               |
| Fatigued                        | 0.915               |
| Cough                           | 0.914               |
| Cancer                          | 0.779               |
| Chronic liver disease           | 0.763               |
| Myalgia                         | 0.763               |
| Sputum                          | 0.509               |
| COPD                            | 0.497               |
| No chronic liver disease        | 0.470               |
| Chronic neurologic disorder     | 0.080               |
| No asthma                       | 0.054               |

ICU, intensive care unit; ADL, activities of daily living; COPD, chronic obstructive pulmonary disease.

ADL score is expressed from 0 to 2, with 0 being independent, 1 being partially dependent, and 2 being total dependent on others.
