# Supplementary material for: Validation of Machine Learning Models to Predict Adverse Outcomes in Patients with COVID-19: A Prospective Pilot Study
Source: PubMed Central journal article supplement — Yonsei Med J. 2022 Apr 20;63(5):422–9. doi: 10.3349/ymj.2022.63.5.422 (PMC9086701; doi:10.3349/ymj.2022.63.5.422), 2022-04-20
Supplement: ymj-63-422-s005.pdf [file ymj-63-422-s005.pdf]

**Supplementary Table 3.** Feature Importance to the Oxygen Score (Gradient Boosting Machine Learning Model) for the Prediction of Patients Requiring Oxygen Supplement

| Feature                           | Relative importance |
|-----------------------------------|---------------------|
| Age                               | 693.250             |
| ADL score 0                       | 331.632             |
| No dyspnea                        | 274.438             |
| Initial body temperature          | 171.588             |
| Dyspnea                           | 106.056             |
| No diabetes                       | 24.562              |
| No hypertension                   | 22.922              |
| Chronic kidney disease            | 20.231              |
| Male                              | 19.708              |
| Female                            | 17.010              |
| ADL score 2                       | 16.812              |
| No chronic kidney disease         | 15.802              |
| No chronic cardiac disease        | 14.171              |
| No headache                       | 13.771              |
| No sputum                         | 11.044              |
| No nausea or vomiting             | 10.524              |
| No heart failure                  | 10.145              |
| No cough                          | 9.857               |
| No smoking                        | 9.472               |
| Headache                          | 9.043               |
| Diabetes                          | 8.600               |
| No chest pain                     | 8.589               |
| No diarrhea                       | 8.382               |
| Nausea or vomiting                | 8.114               |
| No sore throat                    | 7.869               |
| No chronic liver disease          | 7.447               |
| Chest pain                        | 7.075               |
| Hypertension                      | 6.961               |
| No asthma                         | 6.723               |
| Not fatigued                      | 6.712               |
| Cough                             | 6.426               |
| No dementia                       | 6.183               |
| Chronic cardiac disease           | 6.072               |
| No myalgia                        | 5.934               |
| No hemoptysis                     | 5.637               |
| Diarrhea                          | 5.291               |
| Asthma                            | 5.072               |
| Current smoker                    | 4.773               |
| Sore throat                       | 4.640               |
| No cancer                         | 4.378               |
| No rhinorrhea                     | 4.261               |
| Chronic liver disease             | 3.711               |
| Ex-smoker                         | 3.658               |
| No COPD                           | 3.564               |
| COPD                              | 3.375               |
| Sputum                            | 3.267               |
| Fatigued                          | 3.176               |
| Myalgia                           | 3.147               |
| ADL score 1                       | 2.150               |
| Dementia                          | 2.053               |
| Cancer                            | 1.976               |
| Heart failure                     | 1.370               |
| No autoimmune disease             | 1.358               |
| Rhinorrhea                        | 1.237               |
| No chronic neurological disorder  | 1.145               |
| Altered mentality                 | 1.090               |
| Autoimmune disease                | 0.673               |
| Anosmia                           | 0.601               |
| Hemoptysis                        | 0.580               |
| Chronic neurological disorder     | 0.542               |
| Chronic hematological disorder    | 0.370               |
| No arthralgia                     | 0.294               |
| No chronic hematological disorder | 0.292               |
| Normal mentality                  | 0.129               |
| Arthralgia                        | 0.064               |

ADL, activities of daily living; COPD, chronic obstructive pulmonary disease. ADL score is expressed from 0 to 2, with 0 being independent, 1 being partially dependent, and 2 being total dependent on others.
